# Supplementary material for: Synthesis of Polyaniline coated Graphene Oxide @ SrTiO3 Nanocube Nanocomposites for Enhanced Removal of Carcinogenic Dyes from Aqueous Solution
Source: Preprints.org preprint supplement (doi:10.20944/preprints201608.0128.v1), 2016-08-11
Supplement: Supplementary file 1 [file supplementary]

# Supplementary Materials

**Journal:** Polymers

**Title:** "Synthesis of Polyaniline Coated Graphene Oxide @  $\text{SrTiO}_3$  Nanocube Nanocomposites for Enhanced Removal of Carcinogenic Dyes from Aqueous Solution"

**Authors:** Syed Shahabuddin<sup>a</sup>, Norazilawati Muhamad Sari<sup>a</sup>\*, Muhammad Afzal Kamboh<sup>a</sup>, Hamid, and Sharifah Mohamad<sup>a</sup>

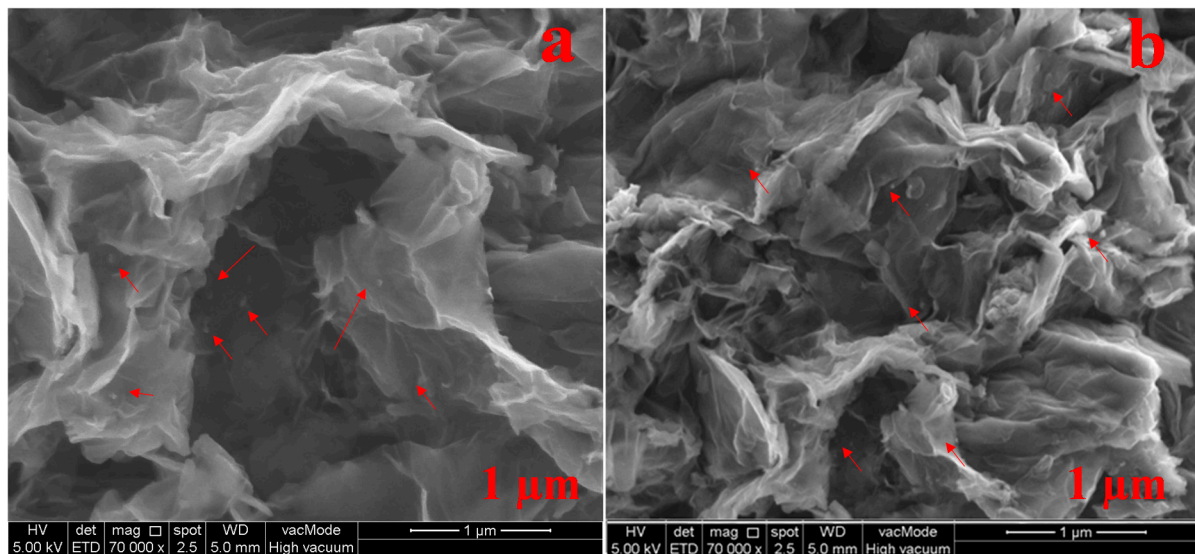

**Figure S1.** FESEM images of (a) and (b) GOPSr-2 nanocomposite at different magnifications.

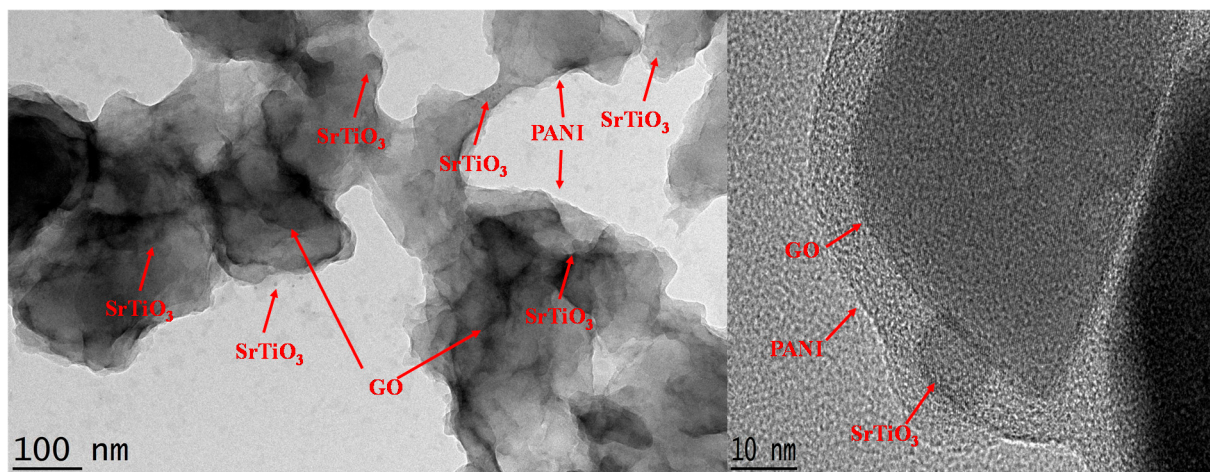

**Figure S2.** TEM images GOPSr-2 nanocomposite at different magnifications.

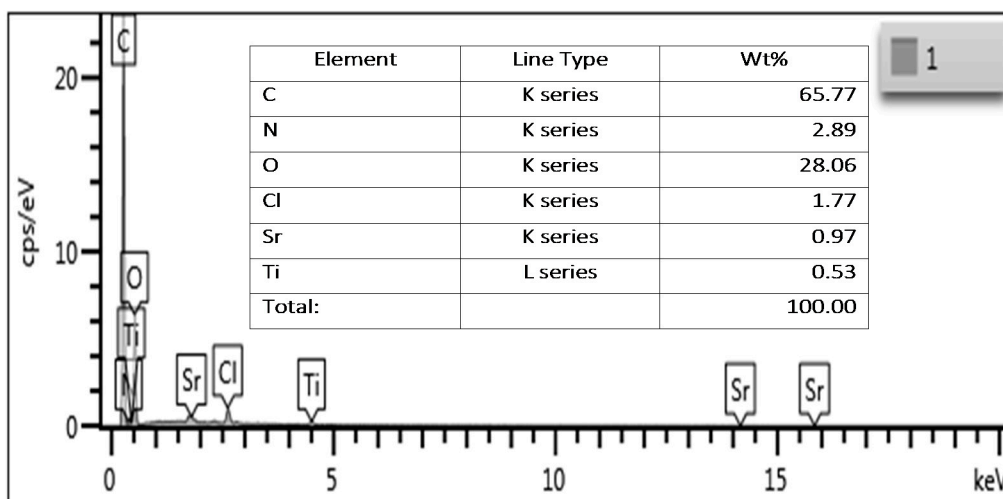

**Figure S3.** EDX spectrum of GOPSr-2 nanocomposite.

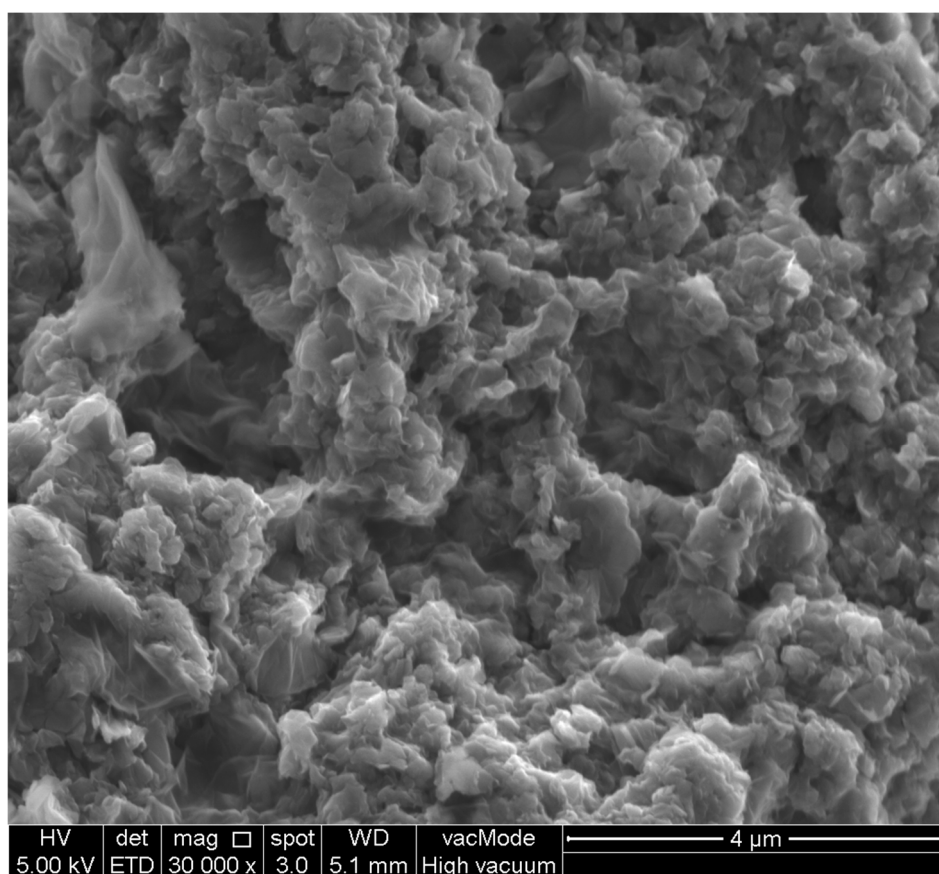

**Figure S4.** FESEM image of GOPSr-2 nanocomposite after fifth reusability cycle.
